# Supplementary material for: Health impacts of Armed Conflict in Ethiopia: A Scoping Review of Evidence from 2018-2023
Source: Research Square preprint supplement (doi:10.21203/rs.3.rs-6549200/v1), 2025-08-20
Supplement: Supplementary file 1 [file 61a5ee882d70f009293a9fed.xlsx]

## Sheet: Sheet1
	List of articles
	Athor,year of publication	Title	Research questions or objectives	Method	Sample Size	Data Source	Study area of focus	Period of data collection	study location	summary of findings /main result
1	Abebaw N et al,2022	Narrative Descriptive Reports on Public Health Impact of Conflict among War-Affected Zones at Amhara Region, 2022	To assess the impact of conflict on public health within the war-affected zones of the Amhara region.	A descriptive cross-sectional study	NOT CLEAR	secondary	general public health	2022	Amhara region	Nearly half of health care institutions were either damaged or looted. Chronic disease follow-up and treatment of nearly10, 333 patients was disturbed Nearly 7, 000 pregnant and lactating women lost their obstetric care follow up
2	Arage et al.2023	Exploring the health consequences of armed conflict: the perspective of Northeast Ethiopia, 2022: a qualitative study	To explore the health consequences of the northern Ethiopian conflict in the North Wollo zone, northeast	A qualitative study	100	primary	general public health	May to June 2022	Amhara region	Death, food insecurity, supply chain interruptions and forced displacement were common consequences of the armed conflict. Sexual violence including rape, health system break down, inadequate supply of medicines, health care system damage and displacement health care providers were also bad faces of the armed conflict.
3	Fisseha G, et al.,2023	War- related sexual and gender- based violence in Tigray, Northern Ethiopia: a community- based study	This study is aimed at assessing war- related SGBV in war- affected Tigray, Ethiopia.	A community- based survey	5171	Primary	reproductive health in the context of conflict	4–20 August 2021	Tigray	Nearly 40 percent of participated women have experienced SGBV The 15–24 years old women were the most attached (29.2%). Majority of SGBV survivors (89.7%) did not get support.
4	G.M. Gedef et al.,	Institutional delivery service utilization and associated factors in fragile and conflict-affected situations in Sekota town, Northern Ethiopia, 2022: A community-based cross-sectional study	this study targeted to assess institutional delivery services usage and influencing factors in a fragile and conflictaffected situation in Sekota town, Northern Ethiopia.	A community-based cross-sectional study	420	Primary	Maternal and Reproductive health	July 15th to 30th, 2022.	Amhara region	Nearly half (48.1%) of mother got trained birth attendance. Maternal education, recent antenatal care follow up, gaining information on birth preparedness and complication readiness and being displaced were determinant factors.
5	Gebeyaw Biset, et al,2023	Post-traumatic stress disorders among children and adolescents in conflict-affected zones of Amhara region, February 2022	To assess posttraumatic stress disorders among children and adolescents in conflict-affected zones of the Amhara region in Ethiopia from January to February 2022.	A community-based cross-sectional study	846	primary	Mental health	January to February 2022.	Amhara region	Nearly 70 % of children experienced mental trauma Out of these, 36.45% of participants developed posttraumatic stress disorders.
6	Gebrehiwet TG et al.,2023	War and Health Care Services Utilization for Chronic Diseases in Rural and Semiurban Areas of Tigray, Ethiopia	To assess the association of the war with the utilization of health care services for patients with chronic diseases.	a registry-based crosssectional study	4645	secodary	Chronic disease	November 4, 2020, to June 30, 2021)	Tigray	Of 4645 patients with chronic diseases, only 21% got treatment during the war time. Tuberculosis (33%), Hypertension (19%), mental disorders (20%) and type 2 diabetes mellitus were commonly recorded chronic diseases.
7	Gebretsadik et al.2023	Prevalence and multi-level factors associated with acute malnutrition among children aged 6–59 months from war affected communities of Tigray, Northern Ethiopia, 2021: a cross-sectional study	Thus, this study aimed to identify individual and community level factors associated with acute malnutrition among children aged 6–59 months from armed conflict affected settings of Tigray, Ethiopia.	A community based cross-sectional study	3614	Primary	Nutrition	July 15 to Aug 15, 2021	Tigray	The prevalence of severe, moderate, and global acute malnutrition was found to be 5.1%, 21.8%, and 26.9%,
8	Gesesew H, et al.2021	The impact of war on the health system of the Tigray region in Ethiopia: an assessment	This analysis provides an assessment of the health system before and during the war.	analtical method	NOT CLEAR	secodary	HEALTH SYSTEM	2020 to June 2021	Tigray	At 90th day of the eruption of the war conflict all maternal and child health services were including antenatal and post natal are and institutional delivery were stopped. Huge livelihood damage and health systems collapse was evidenced
9	Gutema et al.2023	Impact of Armed Conflicts on Public Health Infrastructure and Services in Oromia, Ethiopia.	The objective of this study is to assess and document the impacts of armed conflicts in Oromia on the public health infrastructure.	quantitative review of administrative records and reports employing a qualitative analytical prism.	NOT CLEAR	secodary	Health system	2020 to 2023:	Oromia	Vehicles including ambulances giving services to the affected community were attached. Sever acute malnutrition cases were reported
10	Habtu Debash, et al.,2023	Malaria surveillance, outbreak investigation, response and its determinant factors in Waghemra Zone, Northeast Ethiopia: unmatched case–control study	to assess the occurrence of malaria outbreaks and investigate contracting factors in Waghemra Zone, Northeast Ethiopia.	A community-based case–control study	260	primary	infectious disease	September 14 to November 27, 2022.	Amhara region	13,136 confirmed cases, 26.5 per 1000 attack rate, and 43% positivity rate were pertinent finings. Age of children, availability of open water holes and sleeping outside house were contributing factors for being attacked by malaria.
11	KathrynA.O’Connell et al,2022	Meeting the Sexual and Reproductive Health Needs of Internally Displaced Persons in Ethiopia’s Somali Region: A Qualitative Process Evaluation	To assess reproductive needs of internally displaced persons	Qualitative Process Evaluation	13 key informant interviews 4 focus group discussions	primary	reproductive health in the context of conflict	2021	Somali r	A fragile security situation, provider retention, and difficulty of accessing GBV services were among operational challenges..
12	Kemei et al.2023	The forms and adverse effects of insecurities among internally displaced children in Ethiopia	to explore the forms of insecurities experienced by IDP children in Ethiopia.	an exploratory qualitative case study research		primary	Child mental Health	2023	oromia	The findings showed that IPD children are at a greater risk Generally, children faced basic need, academic, economic, and physical and mental health insecurity.
13	Makango et al.2023	Prevalence and factors associated with post-traumatic stress disorder among internally displaced people in camps at Debre Berhan, Amhara Region, Ethiopia: a cross-sectional study	To determine the prevalence and associated factors of PTSD among internally displaced people in camps at Debre Berhan, Ethiopia.	A cross-sectional study	406	primary	Mental health	December 1–30, 2021	Amhara region	More than two third (67.5%) participants experienced PTSD. Mental disorder was very high in the camp.
14	Mengstie et al.2023	Undernutrition and associated factors among internally displaced lactating mothers in Sekota camps, northern Ethiopia: A cross-sectional study	The main aim of this study was to determine the prevalence and investigate the factors associated with undernutrition among internally displaced lactating mothers in Sekota camps, in northern Ethiopia.	A cross-sectional study	420	primary	Nutrition	June 3 to July 10, 2022.	Amhara region	More than half (54.8%) breastfeeding mothers have experienced under nutrition.
15	O’Connell, K.A., 2021	Factors Associated with Sexual and GenderBased Violence in the Somali Region of Ethiopia: Results from a Qualitative Assessment.	The study sought to investigate the reasons for the potential underreporting of SGBV in the Somali region. Specifically, we assessed the perspectives of the community toward SGBV and engaged key informants to help identify factors associated with the relatively low prevalence rates of SGBV in the region.	Qualitative Assessment		primary	Sexual and Reproductive Health		Somali r	Deep rooted cultural and religious beliefs and socioeconomic inequalities are the most significant contributing factors for the occurrence of SGBV. Discrimination, harmful traditional practices, conflict and displacement are other contributing factors for SGBV.
16	Teshome et al.,2023	Post-traumatic stress disorder and associated factors among adult war survivors in Northwest Ethiopia: Community-based, cross-sectional study	This study aimed to assess the prevalence of PTSD and associated factors among war survivors in Nefas Meewcha Town, South Gondar Zone, Ethiopia, 2022.	A community based cross-sectional study	812	primary	Mental health	May 2022	Amhara region	Nearly 40 percent of participants were affected by PTSD
17	Titiyos, A., 2020	Sexual-and-Reproductive-Health-Knowledge-Attitudes-and-Practices-among-Internally-Displaced-Persons-in-the-Somalia-Region-of-Ethiopia.	The objective of this study is to understand the current SRHR needs and perceptions of IDPs in the Somali region of Ethiopia, in order to inform our programming.	cross-sectional quantitative study between	448	primary	Sexual and Reproductive Health	October and November 2019.	Somali r	More than 50 percent of IDP women gave birth to five or more children. 64.9 percent IPD mothers gave birth within 12 months Lack of formal healthcare system, distance to healthcare, lack of transportation, or personal preference were reason mentioned by participants. Nearly four fifth (78.3%) of participants have attended antenatal care for their last pregnancy. Also nearly all (98.2%) had recomm…
18	Weldegiargis et al. 2023	Armed conflict and household food insecurity: evidence from war-torn Tigray, Ethiopia.	To determine the status of household food insecurity in the armed conflict affected communities of Tigray in terms of Access, Experience and Hunger scale.	Community-based cross-sectional study	4160	primary	Nutrition	July and August 2021.	Tigray	Household food insecurity and hunger scales had significantly increased by 43.3 and 32.5 percentage points from the prewar period.
19	Yigzaw et al.2023	Comprehensive mental health and psychosocial support for war survivors at Chenna Kebele, Dabat woreda, North Gondar, Ethiopia	To conduct community diagnosis, identify individuals experiencing psychological distress, and provide comprehensive mental health and psychosocial support for the Chenna Kebele population in Dabat Woreda, North Gondar, Ethiopia.	A mixed research approach,	550 households	primary	Mental health	December 1, 2021, to January 30, 2022.	Amhara region	PTSD, major depressive disorder, prolonged grief, and neurologic disorders were the commonly reported mental disorders. Female participants were more prone for PTSD than male participants.
